# Supplementary material for: Come on in, the Water is…Frozen
Source: MDPI journal article supplement (doi:10.3390/v14102297), 2012-01-01
Supplement: s1 [file s1]

**Table S3.** Characteristics of deduced proteins encoded by papaya virus X (PapVX) genome determined by predictive algorithms.

| <b>ORF No<sup>a</sup></b> | <b>Gene</b> | <b>Calculated <i>Mr</i> (kDa)</b> | <b>Highest scoring virus protein/<i>E</i>-value/query coverage (Blast P)</b> |
|---------------------------|-------------|-----------------------------------|------------------------------------------------------------------------------|
| 1                         | <i>RdRp</i> | 1503.182                          | PiVX/0.0/100%                                                                |
| 2                         | <i>TGB1</i> | 220.555                           | PiVX/3 x 10 <sup>-113</sup> /97%                                             |
| 3                         | <i>TGB2</i> | 108.636                           | CVX/6 x 10 <sup>-34</sup> /98%                                               |
| 4                         | <i>TGB3</i> | 62.273                            | PVX/5 x 10 <sup>-15</sup> /96%                                               |
| 5                         | <i>CP</i>   | 214.090                           | SchVX/3 x 10 <sup>-109</sup> /100%                                           |

<sup>a</sup> ORF numbers are represented in the 5' to 3' direction of the viral genome and correspond to those in Figure 3A.
