# Supplementary material for: Come on in, the Water is…Frozen
Source: MDPI journal article supplement (doi:10.3390/v14102297), 2012-01-01
Supplement: s1 [file s1]

**Table S1.** List of viruses used for phylogenetic inferences.

| Species                                        | NCBI Accession number | Genus             |
|------------------------------------------------|-----------------------|-------------------|
| <i>Pitaya virus X</i>                          | NC_024458.1           | <i>Potexvirus</i> |
| <i>Zygocactus virus X</i>                      | NC_006059.1           | <i>Potexvirus</i> |
| <i>Cactus virus X</i>                          | NC_002815.2           | <i>Potexvirus</i> |
| <i>Schlumbergera virus X</i>                   | NC_011659.1           | <i>Potexvirus</i> |
| <i>Opuntia virus X</i>                         | NC_006060.1           | <i>Potexvirus</i> |
| <i>Allium virus X</i>                          | NC_012211.2           | <i>Potexvirus</i> |
| <i>Hosta virus X</i>                           | NC_011544.1           | <i>Potexvirus</i> |
| <i>Hydrangea ringspot virus</i>                | NC_006943.1           | <i>Potexvirus</i> |
| <i>Tulip virus X</i>                           | NC_004322.1           | <i>Potexvirus</i> |
| <i>Plantago asiatica mosaic virus</i>          | NC_003849.1           | <i>Potexvirus</i> |
| <i>Cassava common mosaic virus</i>             | NC_001658.1           | <i>Potexvirus</i> |
| <i>Tamus red mosaic virus</i>                  | NC_016003.1           | <i>Potexvirus</i> |
| <i>Clover yellow mosaic virus</i>              | NC_001753.1           | <i>Potexvirus</i> |
| <i>Alternanthera mosaic virus</i>              | NC_007731.1           | <i>Potexvirus</i> |
| <i>Papaya mosaic virus</i>                     | NC_001748.1           | <i>Potexvirus</i> |
| <i>Babaco mosaic virus</i>                     | NC_036587.1           | <i>Potexvirus</i> |
| <i>Senna mosaic virus</i>                      | NC_030746.1           | <i>Potexvirus</i> |
| <i>Vanilla virus X</i>                         | NC_035205.1           | <i>Potexvirus</i> |
| <i>Yam virus X</i>                             | NC_025252.1           | <i>Potexvirus</i> |
| <i>Euonymus yellow vein virus</i>              | NC_035190.1           | <i>Potexvirus</i> |
| <i>Phaius virus X</i>                          | NC_010295.1           | <i>Potexvirus</i> |
| <i>Lily virus X</i>                            | NC_007192.1           | <i>Potexvirus</i> |
| <i>Mint virus X</i>                            | NC_006948.1           | <i>Potexvirus</i> |
| <i>Cassava virus X</i>                         | NC_034375.1           | <i>Potexvirus</i> |
| <i>Potato virus X</i>                          | NC_011620.1           | <i>Potexvirus</i> |
| <i>Strawberry mild yellow edge virus</i>       | NC_003794.1           | <i>Potexvirus</i> |
| <i>Plantain virus X</i>                        | NC_028649.1           | <i>Potexvirus</i> |
| <i>Malva mosaic virus</i>                      | NC_008251.1           | <i>Potexvirus</i> |
| <i>Narcissus mosaic virus</i>                  | NC_001441.1           | <i>Potexvirus</i> |
| <i>Asparagus virus 3</i>                       | NC_010416.1           | <i>Potexvirus</i> |
| <i>Lettuce virus X</i>                         | NC_010832.1           | <i>Potexvirus</i> |
| <i>Alstroemeria virus X</i>                    | NC_007408.1           | <i>Potexvirus</i> |
| <i>Cymbidium mosaic virus</i>                  | NC_001812.1           | <i>Potexvirus</i> |
| <i>Pepino mosaic virus</i>                     | NC_004067.1           | <i>Potexvirus</i> |
| <i>Potato aucuba mosaic virus</i>              | NC_003632.1           | <i>Potexvirus</i> |
| <i>White clover mosaic virus</i>               | NC_003820.1           | <i>Potexvirus</i> |
| <i>Nerine virus X</i>                          | NC_007679.1           | <i>Potexvirus</i> |
| <i>Euonymus yellow mottle associated virus</i> | NC_055574.1           | <i>Potexvirus</i> |
| <i>Cnidium virus X</i>                         | NC_055546.1           | <i>Potexvirus</i> |
| <i>Bamboo mosaic virus</i>                     | NC_001642.1           | <i>Potexvirus</i> |
| <i>Foxtail mosaic virus</i>                    | NC_001483.1           | <i>Potexvirus</i> |
| <i>Turtle grass virus X</i>                    | NC_040644.1           | <i>Potexvirus</i> |
| <i>Ambrosia asymptomatic virus 1</i>           | NC_055542.1           | <i>Potexvirus</i> |

|                                            |             |                     |
|--------------------------------------------|-------------|---------------------|
| <i>Cassava Colombian symptomless virus</i> | KC505252.1  | <i>Potexvirus</i>   |
| <i>Lagenaria mild mosaic virus</i>         | NC_043079.1 | <i>Potexvirus</i>   |
| <i>Indian citrus ringspot virus</i>        | NC_003093.1 | <i>Potexvirus</i>   |
| <i>Citrus yellow vein clearing virus</i>   | NC_026592.1 | <i>Potexvirus</i>   |
| <i>Vanilla latent virus</i>                | NC_035204.1 | <i>Allexivirus</i>  |
| <i>Alfalfa virus S</i>                     | NC_034622.1 | <i>Allexivirus</i>  |
| <i>Arachis pintoï virus</i>                | NC_032104.1 | <i>Allexivirus</i>  |
| <i>Garlic virus B</i>                      | NC_025789.1 | <i>Allexivirus</i>  |
| <i>Garlic virus D</i>                      | NC_022961.1 | <i>Allexivirus</i>  |
| <i>Blackberry virus E</i>                  | NC_015706.1 | <i>Allexivirus</i>  |
| <i>Garlic virus X</i>                      | NC_001800.1 | <i>Allexivirus</i>  |
| <i>Garlic virus E</i>                      | NC_004012.1 | <i>Allexivirus</i>  |
| <i>Shallot virus X</i>                     | NC_003795.1 | <i>Allexivirus</i>  |
| <i>Garlic virus A</i>                      | NC_003375.1 | <i>Allexivirus</i>  |
| <i>Garlic virus C</i>                      | NC_003376.1 | <i>Allexivirus</i>  |
| <i>Lolium latent virus</i>                 | NC_010434.1 | <i>Lolavirus</i>    |
| <i>Botrytis virus X</i>                    | NC_005132.1 | <i>Botrexvirus</i>  |
| <i>Donkey orchid symptomless virus</i>     | NC_022894.1 | <i>Platypuvirus</i> |

---
