# Supplementary material for: Come on in, the Water is…Frozen
Source: MDPI journal article supplement (doi:10.3390/v14102297), 2012-01-01
Supplement: s1 [file s1]

**Table S2.** Geographical location of papaya collection sites in Argentina and collection dates.

| Province   | Department      | Location                               | Date | GPS data               | Map <sup>a</sup> |
|------------|-----------------|----------------------------------------|------|------------------------|------------------|
| Jujuy      | Ledesma         | Yuto                                   | 2013 | -23.639104, -64.475260 | 1                |
| Jujuy      | Ledesma         | EEA INTA Yuto                          | 2017 | -23.586567, -64.507023 | 2                |
| Jujuy      | Santa Bárbara   | Palma Sola                             | 2018 | -23.970503, -64.294820 | 3                |
| Jujuy      | Ledesma         | Paraje Río Piedras                     | 2018 | -23.401801, -64.506167 |                  |
| Salta      | Orán            | Colonia Santa Rosa                     | 2018 | -23.401801, -64.452116 | 4                |
| Salta      | Orán            | Peña Colorada                          | 2018 | -22.811360, -64.350422 | 5                |
|            |                 |                                        | 2018 | -22.812280, -64.351546 |                  |
| Chaco      | San Fernando    | Resistencia                            | 2017 | -27.468875, -58.974200 |                  |
| Formosa    | Formosa         | Formosa                                | 2019 | -26.192428, -58.179419 |                  |
| Formosa    | Pilcomayo       | Clorinda                               | 2013 | -25.251871, -57.728898 |                  |
| Corrientes | Corrientes      | Corrientes                             | 2013 | -27.475492, -58.777925 |                  |
| Corrientes | Corrientes      | Empedrado                              | 2021 | -27.903315, -58.737316 |                  |
| Misiones   | Leandro N. Alem | Cerro Azul                             | 2015 | -27.640641, -55.504605 |                  |
| Misiones   | Oberá           | Oberá                                  | 2016 | -27.491442, -55.114986 |                  |
| Misiones   | 25 de Mayo      | Paraje El Palmital,<br>Colonia Aurora  | 2019 | -27.286206, -54.489858 |                  |
| Misiones   | 25 de Mayo      | Paraje Cerro Grande,<br>Colonia Aurora | 2019 | -27.407544, -54.489872 |                  |
| Misiones   | 25 de Mayo      | Paraje Las Limas,<br>Colonia Aurora    | 2019 | -27.326556, -54.353164 |                  |
| Misiones   | 25 de Mayo      | Paraje El Progreso,<br>Colonia Aurora  | 2019 | -27.390458, -54.454375 |                  |
| Misiones   | 25 de Mayo      | Paraje Alicia Baja,<br>Colonia Aurora  | 2019 | -27.444689, -54.367283 |                  |
| Misiones   | 25 de Mayo      | Paraje Alicia Baja,<br>Colonia Aurora  | 2019 | -27.429650, -54.357339 |                  |
| Misiones   | 25 de Mayo      | Paraje Alicia Baja,<br>Colonia Aurora  | 2019 | -27.453594, -54.339841 |                  |
| Misiones   | Montecarlo      | Montecarlo                             | 2019 | -26.566604, -54.759699 |                  |

<sup>a</sup> Map references used in Figure 6.
